# Supplementary material for: T-CAST: An optimized CAST-Seq pipeline for TALEN confirms superior safety and efficacy of obligate-heterodimeric scaffolds
Source: PubMed Central journal article supplement (PMC9986454; doi:10.3389/fgeed.2023.1130736), 2023-02-20
Supplement: DataSheet1.pdf [file DataSheet1.pdf]

## *Supplementary Material*

### **T-CAST: An optimized CAST-Seq pipeline for TALEN confirms superior safety and efficacy of obligate-heterodimeric scaffolds**

**Manuel Rhiel**<sup>†1,2</sup>, **Kerstin Geiger**<sup>†1,2,3</sup>, **Geoffroy Andrieux**<sup>4,5,6</sup>, **Julia Rositzka**<sup>1,2</sup>, **Melanie Boerries**<sup>4,5,6,7</sup>, **Toni Cathomen**<sup>1,2,6</sup>, **Tatjana I Cornu**<sup>\* 1,2,6</sup>

<sup>1</sup> Institute for Transfusion Medicine and Gene Therapy, Medical Center-University of Freiburg, 79106 Freiburg, Germany.

<sup>2</sup> Center for Chronic Immunodeficiency (CCI), Medical Center-University of Freiburg, 79106 Freiburg, Germany.

<sup>3</sup> Ph.D. Program, Faculty of Biology, University of Freiburg, 79104 Freiburg, Germany

<sup>4</sup> Institute of Medical Bioinformatics and Systems Medicine, Medical Center-University of Freiburg, Faculty of Medicine, University of Freiburg, Freiburg, Germany.

<sup>5</sup> German Cancer Consortium (DKTK), Partner Site Freiburg, and German Cancer Research Center (DKFZ), Heidelberg, Germany.

<sup>6</sup> Faculty of Medicine, University of Freiburg, 79106 Freiburg, Germany.

<sup>7</sup> Comprehensive Cancer Center Freiburg (CCCF), Medical Center – University of Freiburg, 79106 Freiburg, Germany

**Correspondence:** Corresponding Author [Tatjana.Cornu@uniklinik-freiburg.de](mailto:Tatjana.Cornu@uniklinik-freiburg.de)

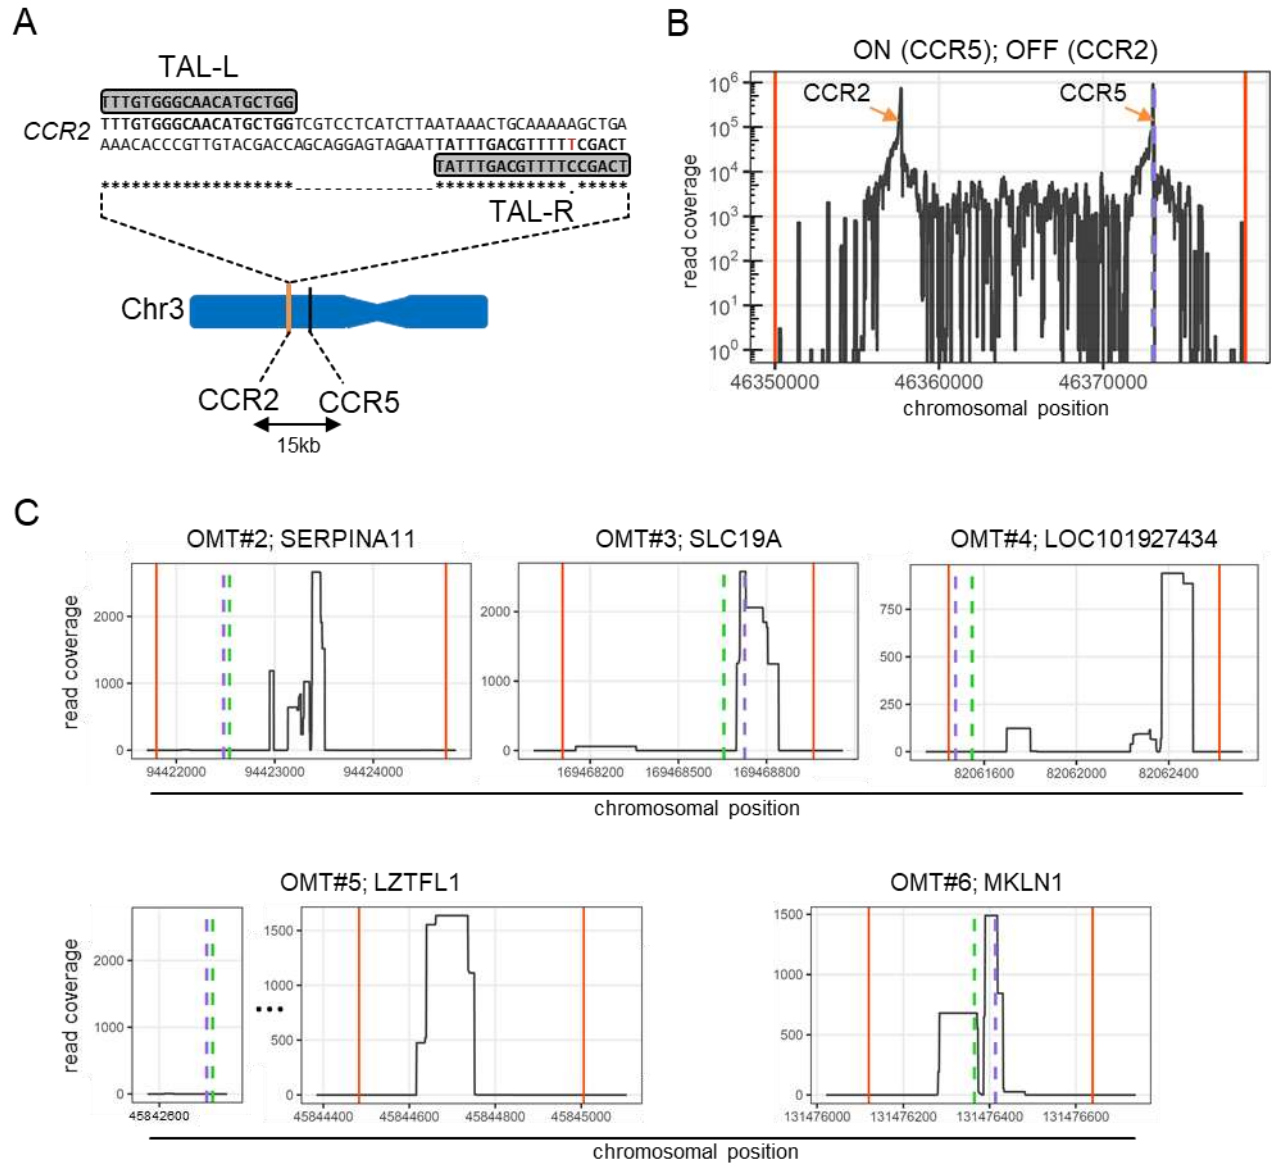

**Supplementary Figure 1. CAST-Seq read coverage at on- and off-target sites of CCR5-targeting TALEN**

(A) Alignment. Illustrated is the CAST-Seq alignment for *CCR2* to both TALEN arms. Mismatched bases are highlighted in red letters, the relative location with respect to the *CCR5* target site is illustrated on the bottom. (B) Coverage plot for the *CCR5-CCR2* region. Plot shows chromosomal position vs. number of reads. (C) Coverage plots for off-target regions. Green and purple dotted lines indicate the putative TALEN binding sites predicted by CAST-Seq.

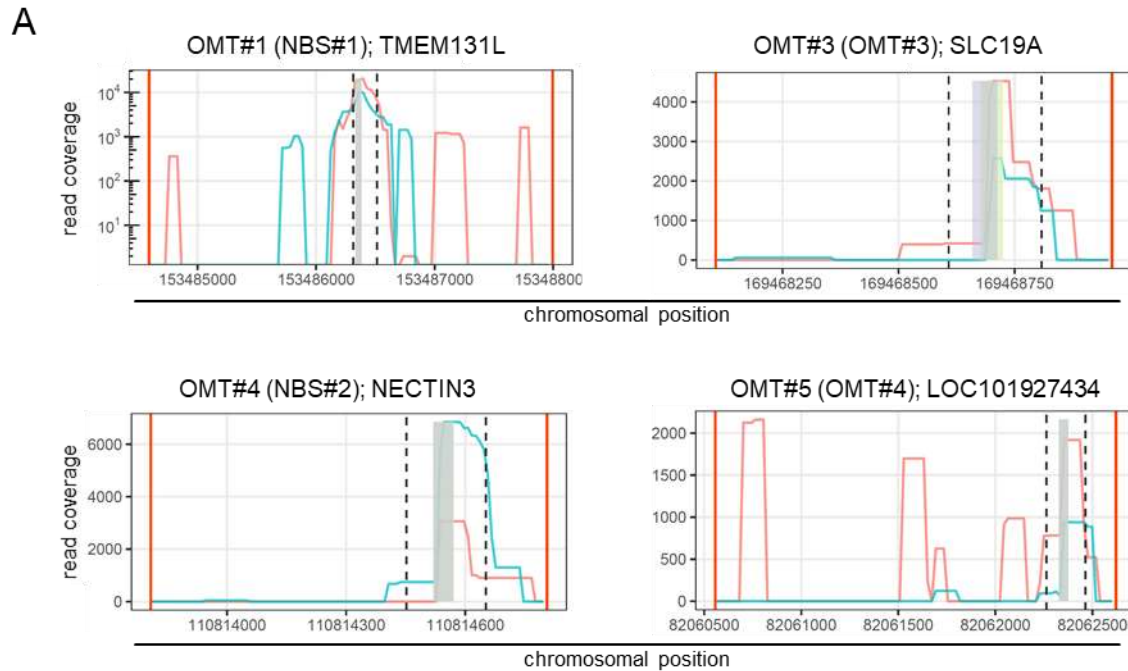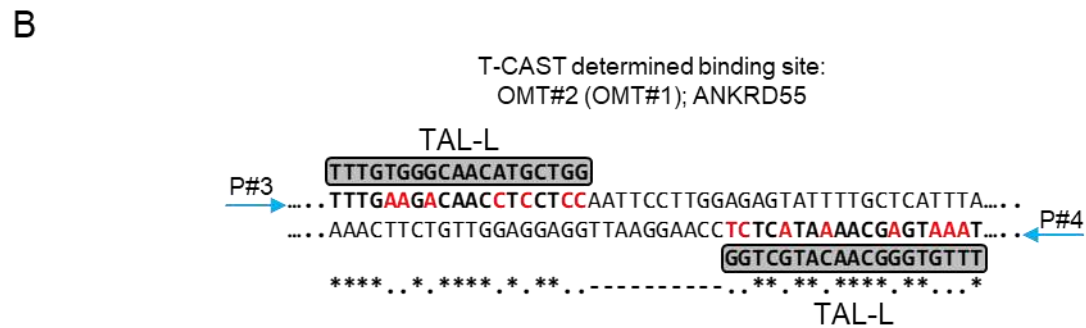

**Supplementary Figure 2. Coverage plot-based nomination of off-target sites by T-CAST**

(A) Coverage plots for off-target regions. Black dotted lines indicate the region ( $\pm 100$  bp) flanking the bin with highest coverage (grey). Plots show coverage of two replicates (turquoise, light red) at indicated OMTs. The former nomination based on the CAST-Seq is given in brackets. Red vertical lines denote boundary of entire region. (B) Alignment. Illustrated is T-CAST based alignment for ANKRD55 (OMT#2) to two left TALEN arms. Mismatched bases are denoted by dots, primer binding sites used for validation (P#3/P#4) are indicated by arrows.

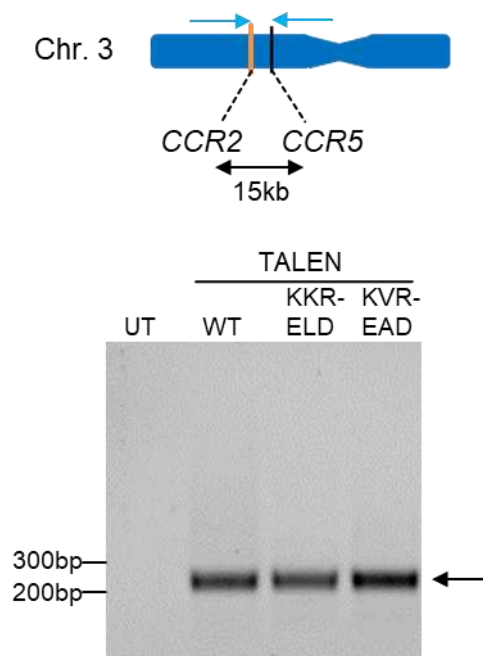

### Supplementary Figure 3. Large deletion between *CCR5* and *CCR2*

Schematic specifying the PCR primer positions (blue arrows) used to amplify the *CCR2-CCR5* junction is shown on top. PCR products were analyzed by agarose gel electrophoresis. The positions of the expected PCR amplicon (arrow) and size markers are indicated.

A

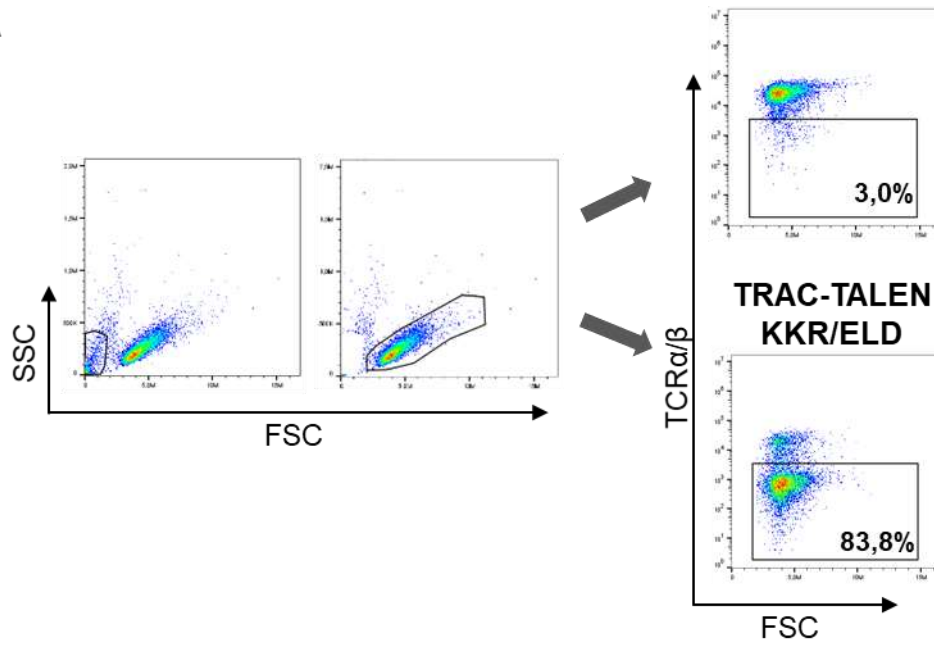

#### Supplementary Figure 4. TALEN-mediated *TRAC* knockout

(A) Gating strategy. Shown is a representative flow cytometry analysis to assess the reduction in TCRα/β surface expression after disruption of *TRAC*. Debris was excluded through gating, and TCRα/β expression was assessed in living cells.

**Supplementary Tables**

**S1:** Target sites and RVDs of CCR5 and TRAC TALEN

**S2:** Prognos analysis of CCR5 TALEN

**S3:** Prognos analysis of TRAC TALEN

**S4:** CAST-Seq output analysis of CCR5 WT TALEN

**S5:** T-CAST output file of CCR5 WT TALEN

**S6:** T-CAST output file of CCR5 KKR-ELD TALEN

**S7:** T-CAST output file of CCR5 KVR-EAD TALEN

**S8:** T-CAST output file of TRAC WT TALEN

**S9:** T-CAST output file of TRAC KKR-ELD TALEN

**S10:** T-CAST output file of TRAC KVR-EAD TALEN

**S11:** Oligonucleotides used in this study

**S12:** T-CAST substitution matrix
